# Supplementary material for: Solvothermal synthesis of microporous superhydrophobic carbon with tunable morphology from natural cotton for carbon dioxide and organic solvent removal applications
Source: Royal Society of Chemistry journal article supplement (doi:10.1039/c5ta01874a), 2015-01-01

# Solvothermal Synthesis of Microporous Superhydrophobic Carbon with Tunable Morphology from Natural Cotton for Carbon Dioxide and Organic Solvent Removal Applications

Deepthi L. Sivadas,<sup>\*a,b</sup> R. Narasimman,<sup>a</sup> R. Rajeev,<sup>b</sup> K. Prabhakaran<sup>a</sup> and K. N. Ninan<sup>a</sup>

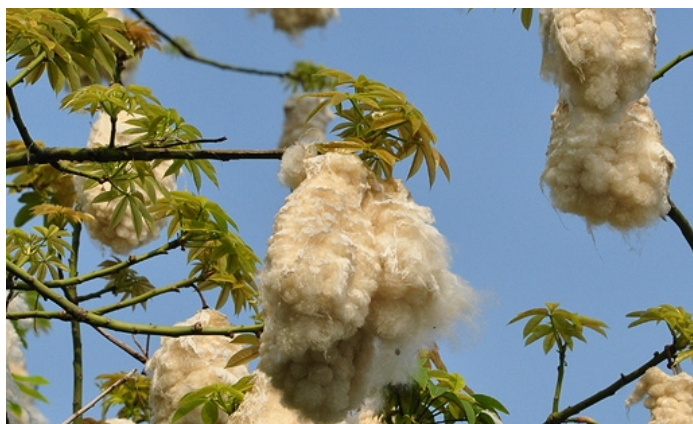

Fig.S1: Photograph of cotton tree

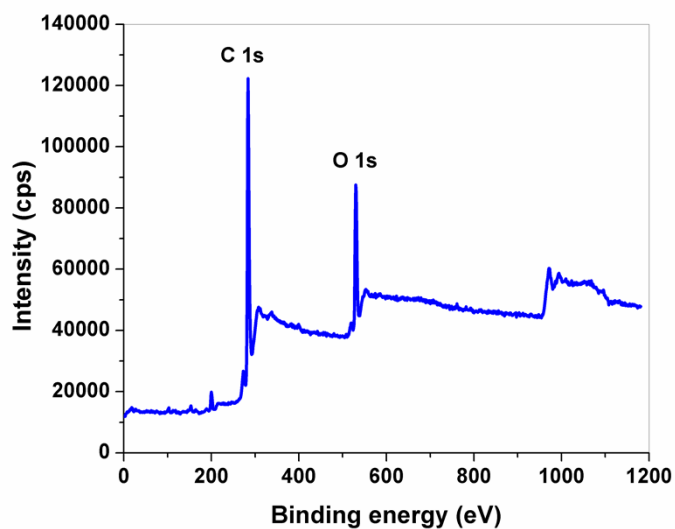

Fig.S2: XPS spectrum of STC-0.04

### Calculation of CO<sub>2</sub>:N<sub>2</sub> Selectivity

We calculated the initial slope of the gas uptake for both N<sub>2</sub> and CO<sub>2</sub>. The ratio of the slopes was used for calculating the selectivity at 25 and 0 °C.

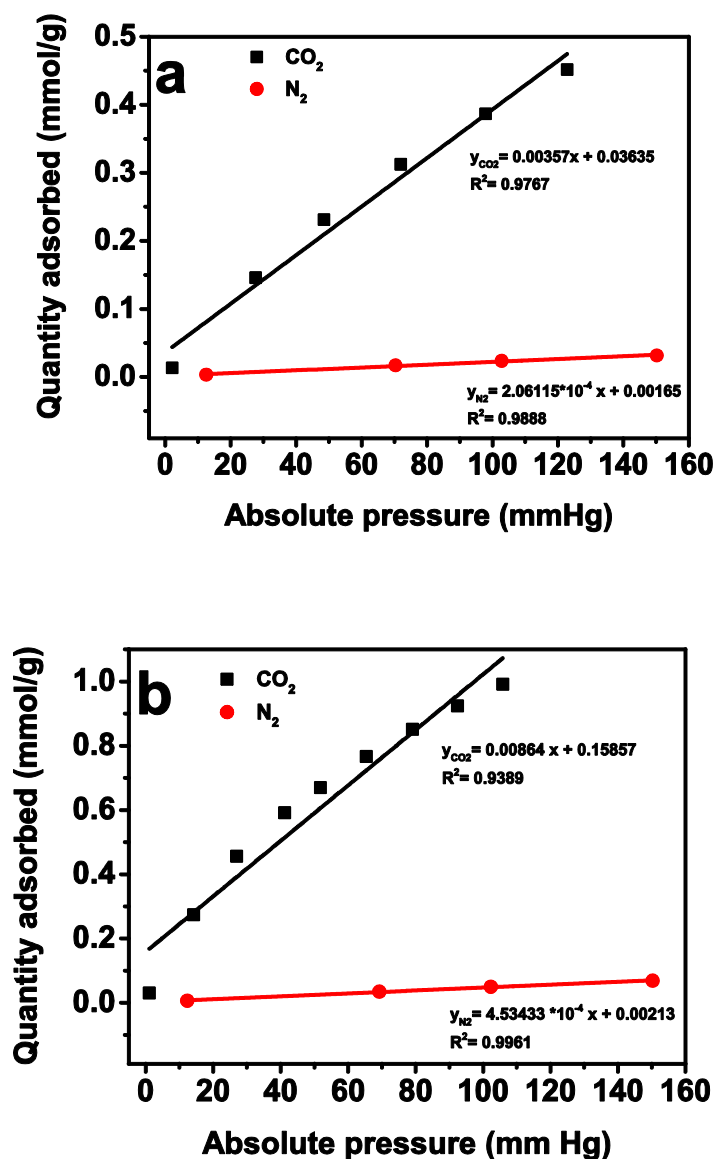

**Figure S3.** Calculation of selectivity of CO<sub>2</sub> adsorption over N<sub>2</sub> adsorption. (a) 25 °C and (b) 0 °C

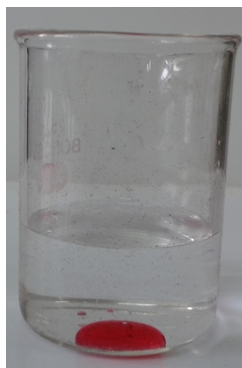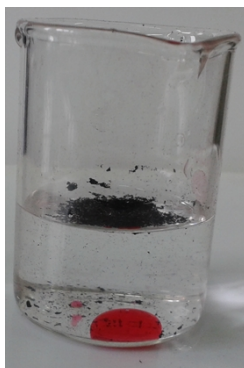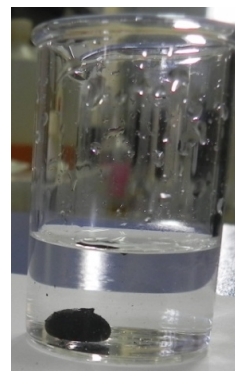

10 ml water + 0.2 ml chloroform

50 mg Cotton-STC-0.04

Cotton-STC  
enclose  
chloroform droplet

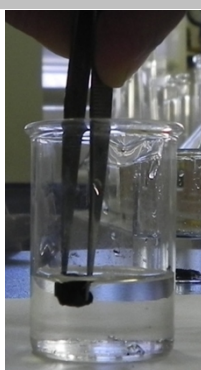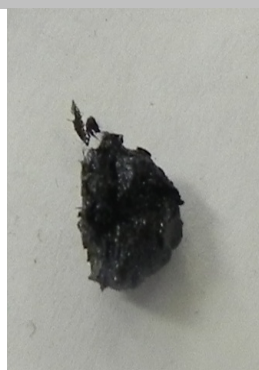

Separation of chloroform  
droplet using forceps

Chloroform droplet with  
Cotton-STC

**Fig. S4** Demonstrates the removal of trace quantity of chloroform from water, and the physical separation of chloroform using forceps. Thus, the difficulties associated with removal of trace amount of organic solvent from water can be solved using non-toxic carbon prepared from natural cotton.

## Comparison of the CO<sub>2</sub> adsorption performance

Table S1: Comparison of the CO<sub>2</sub> adsorption performance of the STC samples and other carbons with similar pore properties

|                                                           | Surface area, m <sup>2</sup> /g | Micro pore volume | Total pore volume cm <sup>3</sup> /g | CO <sub>2</sub> absorption capacity, (1 bar, 25°C) mmol/g | References                                                                                                                     |
|-----------------------------------------------------------|---------------------------------|-------------------|--------------------------------------|-----------------------------------------------------------|--------------------------------------------------------------------------------------------------------------------------------|
| Activated carbon                                          | -                               | 0.57              | -                                    | 1.8                                                       | D. P. Bezerra, R. S. Oliveira, R. S. Vieira, C. L. Cavalcante Jr. and D. C. S. Azevedo, <i>Adsorption</i> , 2011, 17, 235–246. |
| Activated nano carbon fibre                               | 567                             | 0.27              | 0.708                                | 1.1                                                       | Long-Yue Meng and Soo-Jin Park, <i>Bull. Korean Chem. Soc.</i> 2012, Vol. 33, No. 11, 3749- 3754.                              |
| Carbon sphere                                             | 390                             |                   | 0.17                                 | 1.4                                                       | N. P. Wickramaratne and M. Jaroniec, <i>ACS Appl. Mater.Interfaces.</i> , 2013, 5, 1849–1855.                                  |
| N-doped activated carbon from Melamine-formaldehyde resin | 336                             | -                 | 0.19                                 | 2.4                                                       | Ru-Ling Tseng <i>et al.</i> <i>Separation and Purification Technology</i> , 2015, 140, 53-60.                                  |
| N-containing porous carbon                                | 418                             | 0.21              | 0.37                                 | 1.4                                                       | Zhanquan Zhang <i>et al.</i> <i>Journal of Hazardous Materials</i> , 2012, 229-230,                                            |

|                                             |     |       |      |              |                                                                                            |
|---------------------------------------------|-----|-------|------|--------------|--------------------------------------------------------------------------------------------|
|                                             |     |       |      |              | 183-191.                                                                                   |
| Activated carbon from anthracite            | 540 | -     | -    | 1.49 (30 °C) | M. Mercedes Maroto-Valer <i>et al.</i> Fuel Processing Technology, 2005, 14-15, 1487-1502. |
| NaA zeolite/carbon nanocomposite thin films | -   | -     | -    | 1.4          | Zhihui Zhou <i>et al.</i> Separation and Purification Technology, 2007, 55, 392-395.       |
| Cotton-STC                                  | 376 | 0.104 | 0.27 | 1.3          | Present work                                                                               |

### GCMS analysis of spent solvent recovered from autoclave (STC-10)

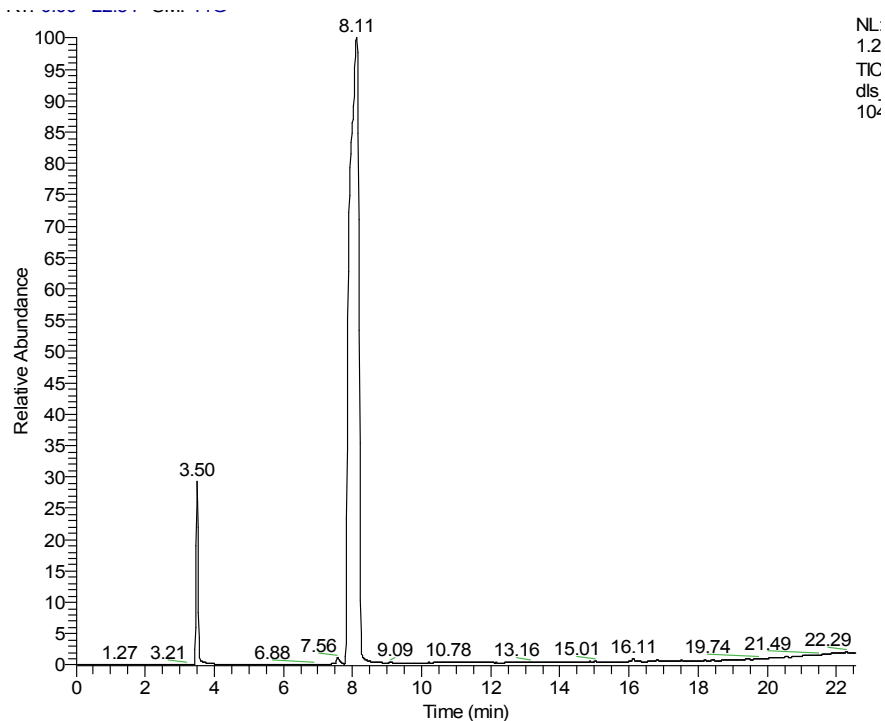

Retention time of 3.5 and 8.11 minutes corresponds to toluene and dichlorobenzene respectively, indicating that in addition to catalytic action, PTSA decompose to toluene and SO<sub>2</sub>.

$^1\text{H}$  NMR analysis of spent solvent recovered from autoclave after solvothermal reaction (STC-10)

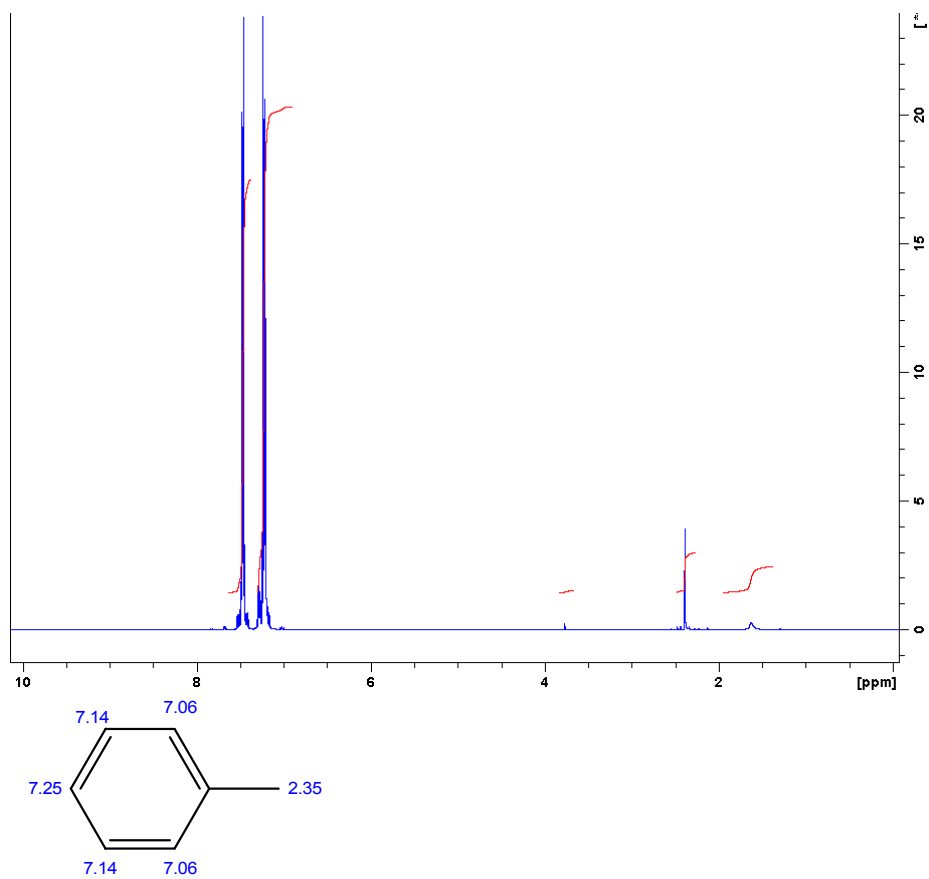

$^{13}\text{C}$  NMR analysis of spent solvent recovered from autoclave after solvothermal reaction (STC-10)

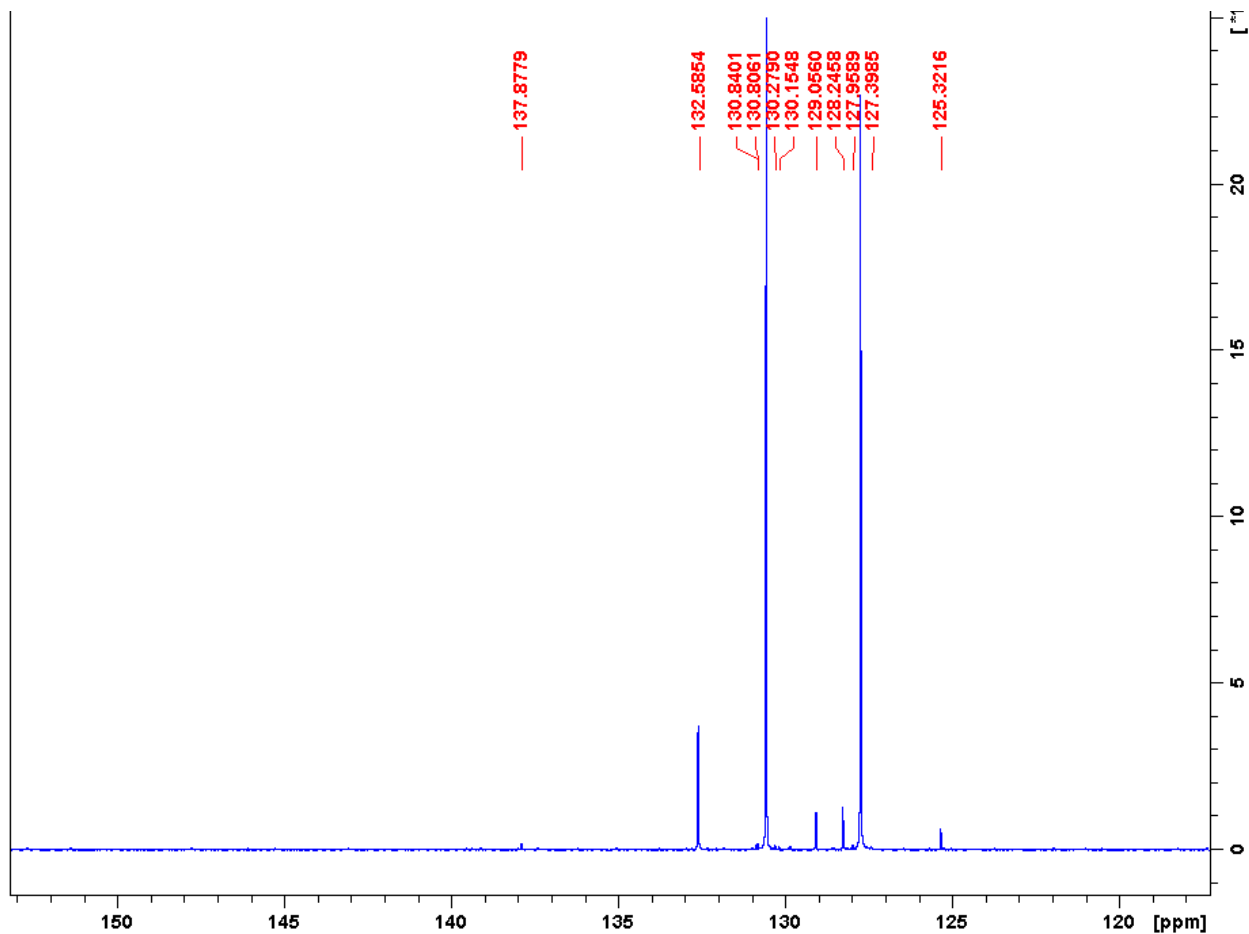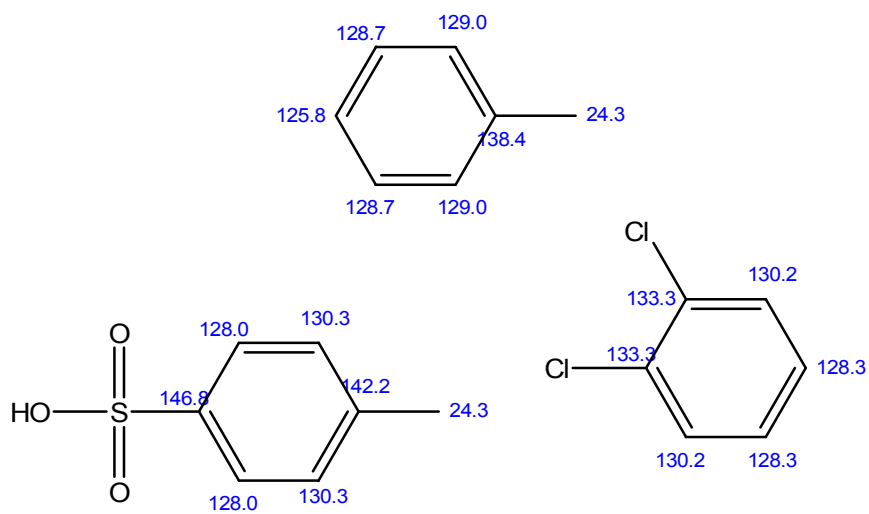

Supplement: c5ta01874a1.pdf [file c5ta01874a1.pdf]
